# Supplementary material for: MMP11 is associated with the immune response and immune microenvironment in EGFR-mutant lung adenocarcinoma
Source: Front Oncol. 2023 Jan 23;13:1055122. doi: 10.3389/fonc.2023.1055122 (PMC9900007; doi:10.3389/fonc.2023.1055122)
Supplement: Supplementary file 1 [file DataSheet_1.xlsx]

## Sheet: Sheet1
Information on mutation subtypes of EGFR-mutant LUAD (TCGA)
Sample ID	EGFR mutation subtype	group
TCGA-MP-A4SW-01	L858R	L858R
TCGA-97-8547-01	E746_A750del	Exon19del
TCGA-71-8520-01	L62R, L858R	compound-type
TCGA-86-8074-01	E746_A750del	Exon19del
TCGA-05-4402-01	T751_E758del	Exon19del
TCGA-78-7147-01	L861Q, L387M, D1083Efs*11	compound-type
TCGA-86-8075-01	L858R	L858R
TCGA-05-4410-01	R377S	uncommon-type
TCGA-78-7155-01	K754I, Q432H, G901V	compound-type
TCGA-69-7760-01	E709_T710delinsD	uncommon-type
TCGA-75-6207-01	E746_A750del	Exon19del
TCGA-05-4382-01	R222L, E545Q	compound-type
TCGA-49-4501-01	E746_A750del	Exon19del
TCGA-55-6968-01	E866K	uncommon-type
TCGA-55-6981-01	L747_T751del	Exon19del
TCGA-55-A48Z-01	G719A	uncommon-type
TCGA-97-A4M7-01	L858R	L858R
TCGA-67-6217-01	L858R	L858R
TCGA-L9-A50W-01	T790M, L858R	compound-type
TCGA-62-A46U-01	E746_A750del	Exon19del
TCGA-86-A4P7-01	E709_T710delinsD	uncommon-type
TCGA-86-8055-01	L858R	L858R
TCGA-55-8206-01	E746_A750del	Exon19del
TCGA-91-6835-01	L858R	L858R
TCGA-62-8402-01	E746_A750del	Exon19del
TCGA-50-5066-01	X210_splice	uncommon-type
TCGA-78-7158-01	L907M	uncommon-type
TCGA-95-7947-01	I91V, R1052I	compound-type
TCGA-38-4628-01	E746_A750del	Exon19del
TCGA-67-3770-01	L858R	L858R
TCGA-97-8177-01	L858R	L858R
TCGA-97-8171-01	E746_A750del	Exon19del
TCGA-44-A4SU-01	S768I, G719C	compound-type
TCGA-55-A57B-01	L747_T751del	Exon19del
TCGA-44-5645-01	A767_V769dup	uncommon-type
TCGA-50-6591-01	L833V, K754_I759del	compound-type
TCGA-95-7039-01	S921R	uncommon-type
TCGA-50-6595-01	S768I, G719A	compound-type
TCGA-55-8506-01	L858R	L858R
TCGA-44-2661-01	E746_A750del	Exon19del
TCGA-55-7570-01	V300M	uncommon-type
TCGA-86-8280-01	E746_A750del	Exon19del
TCGA-97-8552-01	E746_A750del	Exon19del
TCGA-49-4490-01	L858R	L858R
TCGA-97-A4M1-01	L858R	L858R
TCGA-49-4494-01	T790M, L858R	compound-type
TCGA-55-6980-01	E709_T710delinsD	uncommon-type
TCGA-69-7765-01	Q486*	uncommon-type
TCGA-55-8096-01	L858R	L858R
TCGA-38-6178-01	E746_A750del	Exon19del
TCGA-97-A4M6-01	E746_A750del	Exon19del
TCGA-64-1681-01	L858R	L858R
TCGA-62-8394-01	L858R	L858R
TCGA-93-A4JP-01	L861Q	uncommon-type
TCGA-75-7025-01	E746_A750del	Exon19del
TCGA-J2-8192-01	E746_A750del	Exon19del
TCGA-50-5944-01	L858R	L858R
TCGA-MP-A4T9-01	L858R	L858R
TCGA-38-4627-01	L62R, L858R	compound-type
TCGA-67-3772-01	L858R	L858R
TCGA-86-8668-01	L858R	L858R
TCGA-62-8397-01	S768_D770duP	uncommon-type
TCGA-55-8616-01	V163	uncommon-type
TCGA-49-6743-01	G652	uncommon-type
TCGA-67-3771-01	I853	uncommon-type
TCGA-38-4629-01	G465R	uncommon-type
